# Supplementary material for: Integrated genomic analyses in PDX model reveal a cyclin-dependent kinase inhibitor Palbociclib as a novel candidate drug for nasopharyngeal carcinoma
Source: PubMed Central journal article supplement (PMC6149192; doi:10.1186/s13046-018-0873-5), 2018-09-20
Supplement: 13046_2018_873_MOESM2_ESM.pdf [file 13046_2018_873_MOESM2_ESM.pdf]

**Table S1. Characteristics of total 17 metastatic NPC patients and the final 5 NPC-PDX lines (grey)**

| Patient No. | Age (y/o) | Gender | Status at biopsy/operation |                       |                          | Previous treatment | PDX engraft | Overall survival (months) | PDX Abb.      |
|-------------|-----------|--------|----------------------------|-----------------------|--------------------------|--------------------|-------------|---------------------------|---------------|
|             |           |        | Tissue source              | Biopsy(B)/Excision(E) | EBV DNA load (copies/ml) |                    |             |                           |               |
| 1           | 42        | Male   | Soft tissue                | E                     | 4,525                    | No                 | Yes         | 13                        | PDX-ST (01)   |
| 2           | 42        | Male   | Neck LN                    | B                     | 326,000                  | CCRT               | Yes         | 14                        | PDX-LN (02)   |
| 3           | 64        | Male   | Lung                       | B                     | 87                       | CCRT               | Yes         | 15                        | PDX-LG (03)   |
| 4           | 52        | Male   | Liver                      | E                     | 3,060                    | CCRT               | Yes         | 7                         | PDX-Lv (04)   |
| 6           | 63        | Female | Lung                       | E                     | 680                      | CCRT               | No          | 28                        |               |
| 7           | 58        | Male   | Lung                       | E                     | 704                      | CCRT               | No          | 20                        |               |
| 8           | 48        | Male   | Liver                      | B                     | 29,020                   | CCRT               | No          | 18                        |               |
| 9           | 45        | Male   | Lung                       | E                     | 4,526                    | CCRT               | No          | 26                        |               |
| 10          | 28        | Male   | Lung                       | E                     | 11,550                   | CCRT               | No          | 17                        |               |
| 12          | 52        | Male   | Neck LN                    | B                     | 1,800,000                | CCRT               | No          | 20                        |               |
| 13          | 52        | Male   | Bone                       | B                     | >2,000,000               | CT                 | Yes         | 5                         | PDX-Bone (13) |
| 16          | 15        | Male   | Neck LN                    | B                     | 4,891                    | No                 | No          | 14                        |               |
| 17          | 46        | Male   | Neck LN                    | B                     | 23,348                   | No                 | No          | 14                        |               |
| 18          | 52        | Male   | Axillary LN                | B                     | 721                      | CCRT               | No          | 6                         |               |
| 19          | 58        | Male   | Lung                       | E                     | 704                      | CCRT               | No          | 10                        |               |
| 20          | 54        | Male   | Neck LN                    | B                     | 39,796                   | CCRT               | No          | 12                        |               |
| 21          | 52        | Male   | Liver                      | B                     | 3,361                    | No                 | No          | 14                        |               |

1. CCRT: concurrent chemoradiotherapy; LN: lymph node; CT: chemotherapy

2. PDX engraft rate: 5/17 (29.4%)

3. Overall survival was defined from taking tissue for PDX to death; PDX engraft positive: negative,  $p=0.033$

4. Biopsy: 10/17 (58.8%)

5. Male: 16/17 (94.1%)
