# Supplementary material for: Integrated genomic analyses in PDX model reveal a cyclin-dependent kinase inhibitor Palbociclib as a novel candidate drug for nasopharyngeal carcinoma
Source: PubMed Central journal article supplement (PMC6149192; doi:10.1186/s13046-018-0873-5), 2018-09-20
Supplement: 13046_2018_873_MOESM3_ESM.pdf [file 13046_2018_873_MOESM3_ESM.pdf]

**Fig. S1**

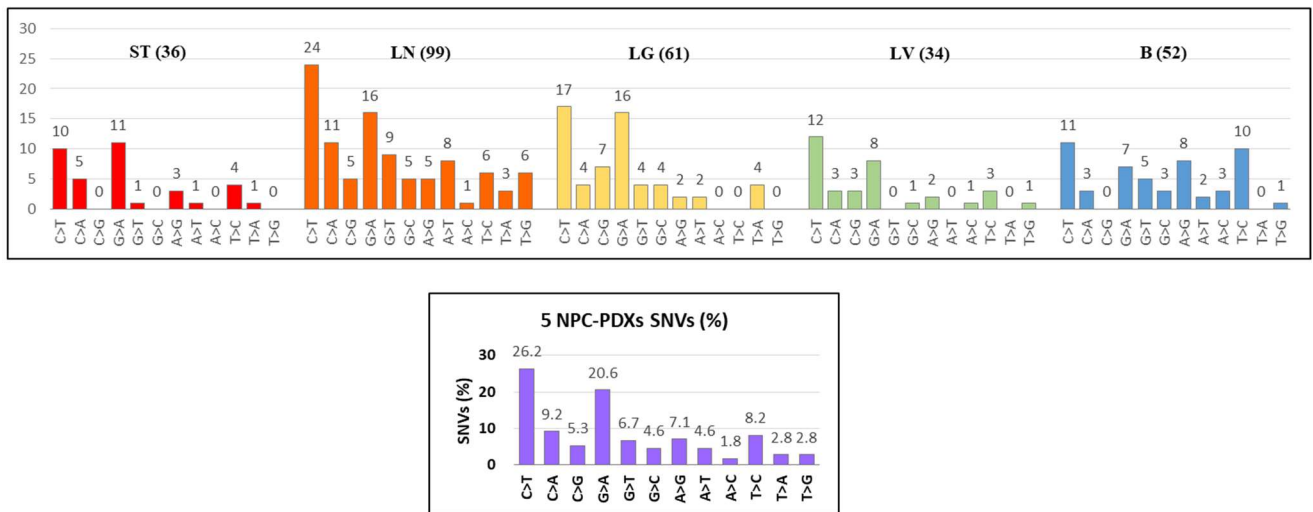

**Fig. S1. Single nucleotide variations (SNVs) of the 5 metastatic NPC-PDXs.**
