# Supplementary material for: Integrated genomic analyses in PDX model reveal a cyclin-dependent kinase inhibitor Palbociclib as a novel candidate drug for nasopharyngeal carcinoma
Source: PubMed Central journal article supplement (PMC6149192; doi:10.1186/s13046-018-0873-5), 2018-09-20
Supplement: 13046_2018_873_MOESM5_ESM.pdf [file 13046_2018_873_MOESM5_ESM.pdf]

Fig. S2

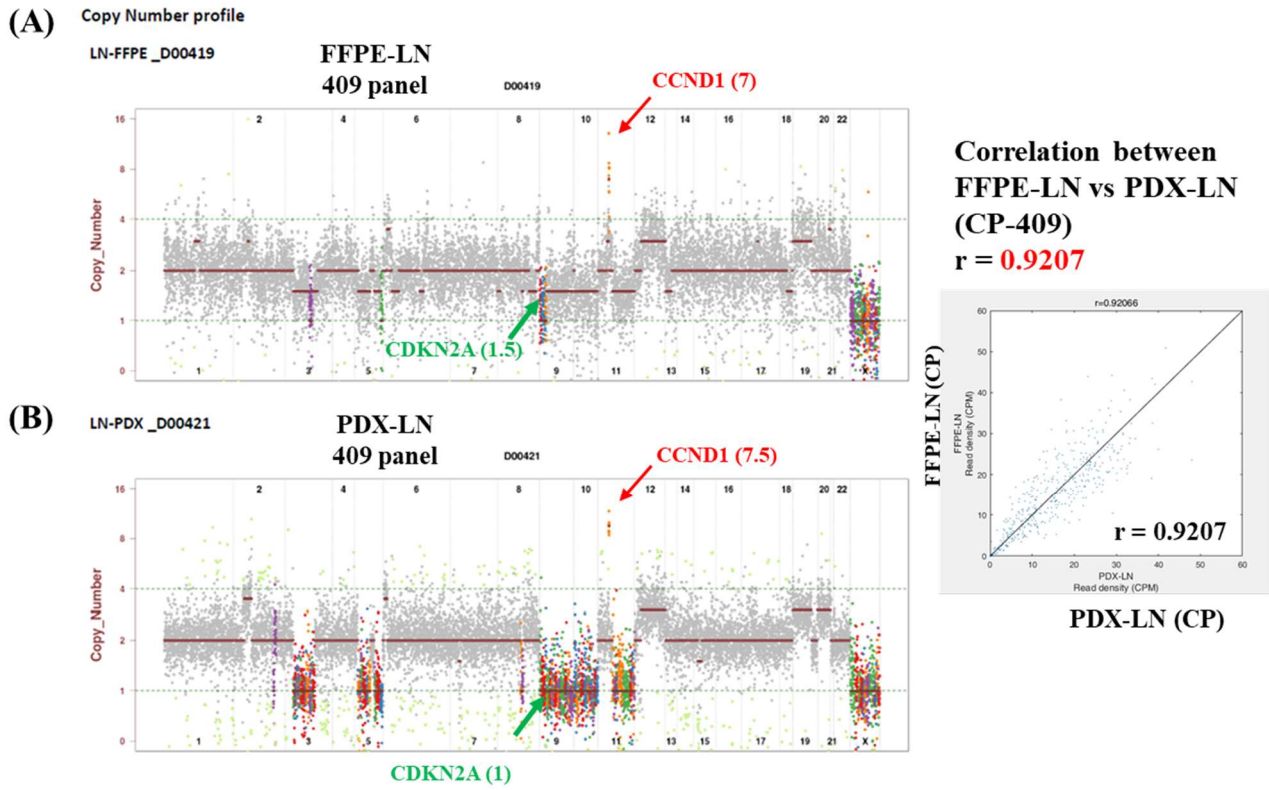

Fig. S2. CNV profile comparison between CP-409 FFPE-LN and PDX-LN.
