# Supplementary material for: Integrated genomic analyses in PDX model reveal a cyclin-dependent kinase inhibitor Palbociclib as a novel candidate drug for nasopharyngeal carcinoma
Source: PubMed Central journal article supplement (PMC6149192; doi:10.1186/s13046-018-0873-5), 2018-09-20
Supplement: 13046_2018_873_MOESM6_ESM.pdf [file 13046_2018_873_MOESM6_ESM.pdf]

**Table S3. The summary of the cancer-related somatic mutations and *CCND1* CNV gain and *CDKN2A* CNV loss of the 5 NPC-PDX tumors.**

| Pathway                      | Gene            | PDX-ST<br>01 | PDX-LN<br>02 | PDX-LG<br>03     | PDX-LV<br>04 | PDX-B<br>13 |
|------------------------------|-----------------|--------------|--------------|------------------|--------------|-------------|
| Cell cycle                   | <i>CCND1</i>    |              | 9.6          | 4.8,<br>missense |              | 6           |
|                              | <i>CDKN2A</i>   | 0            | 1.3          | 0                |              | 0           |
|                              | <i>ANAPC7</i>   |              |              |                  |              |             |
|                              | <i>CCNB1</i>    |              |              |                  |              |             |
|                              | <i>CCNB3</i>    |              |              |                  |              |             |
|                              | <i>CDC7</i>     |              |              |                  |              |             |
| Tumor<br>Suppressor<br>Genes | <i>AIM1</i>     |              |              |                  |              |             |
|                              | <i>DLEU7</i>    |              |              |                  |              |             |
|                              | <i>ING1</i>     |              |              |                  |              |             |
|                              | <i>TIMP3</i>    |              | splice       |                  |              |             |
| Immunity                     | <i>HLA-A</i>    |              |              |                  | stop         |             |
|                              | <i>HLA-DQA2</i> |              |              |                  |              |             |
|                              | <i>HLA-DRB5</i> |              |              |                  |              |             |
|                              | <i>IL1R2</i>    |              |              |                  |              |             |
|                              | <i>TLR3</i>     |              |              |                  |              |             |
| DNA repair                   | <i>TP53</i>     |              |              |                  | stop         |             |
|                              | <i>BRIP1</i>    |              |              |                  |              |             |
| Epigenetic<br>modifiers      | <i>TET3</i>     |              |              |                  |              |             |
|                              | <i>KDM2A</i>    |              |              |                  |              |             |
| Cytoskeleton                 | <i>ARHGEF12</i> | stop         |              |                  |              |             |
|                              | <i>ARHGEF3</i>  |              |              |                  |              |             |
| Drug<br>Resistance           | <i>ABCG1</i>    |              |              |                  |              |             |

|  |             |
|--|-------------|
|  | CNV gain    |
|  | CNV loss    |
|  | missense    |
|  | splice site |
|  | stop gain   |
