# Supplementary material for: Integrated genomic analyses in PDX model reveal a cyclin-dependent kinase inhibitor Palbociclib as a novel candidate drug for nasopharyngeal carcinoma
Source: PubMed Central journal article supplement (PMC6149192; doi:10.1186/s13046-018-0873-5), 2018-09-20
Supplement: 13046_2018_873_MOESM7_ESM.pdf [file 13046_2018_873_MOESM7_ESM.pdf]

**Fig. S3**

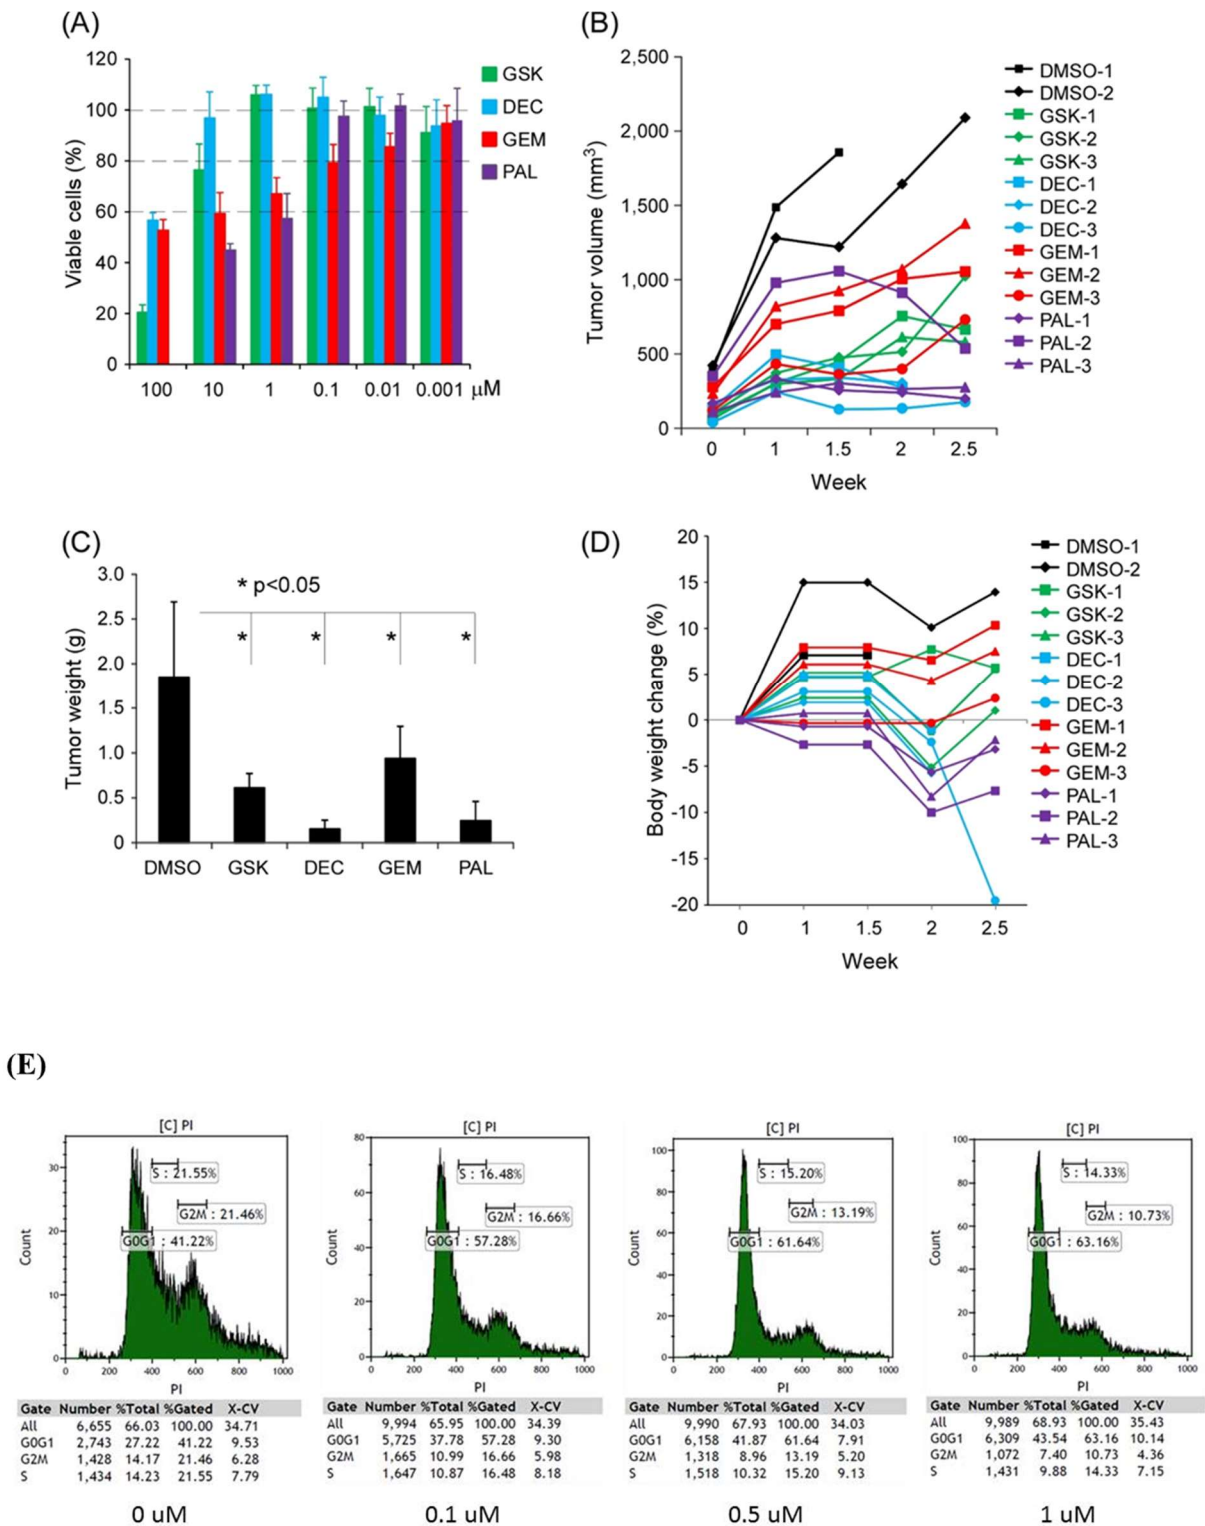

Flow cytometry analysis of C666.1 in the presence of DMSO (control) and PAL (0.1, 0.5, 1 μM)
