# Supplementary material for: Integrated genomic analyses in PDX model reveal a cyclin-dependent kinase inhibitor Palbociclib as a novel candidate drug for nasopharyngeal carcinoma
Source: PubMed Central journal article supplement (PMC6149192; doi:10.1186/s13046-018-0873-5), 2018-09-20
Supplement: 13046_2018_873_MOESM9_ESM.pdf [file 13046_2018_873_MOESM9_ESM.pdf]

**Table S4. RNA-seq mapping statistics of PDX-Bone in the presence of five drug treatments**

| <b>Samples</b>          | <b>Total Reads</b> | <b>Mapped Reads</b> | <b>Mapping Rate</b> | <b>has_mRNA_<br/>mapped Reads<br/>(hg19)</b> | <b>mmu_mRNA_<br/>mapped Reads<br/>(mm10)</b> | <b>lncRNA_<br/>mapped Reads</b> | <b>Virus_<br/>mapped Reads</b> |
|-------------------------|--------------------|---------------------|---------------------|----------------------------------------------|----------------------------------------------|---------------------------------|--------------------------------|
| <b>C. PDX-B Con</b>     | <b>58,401,590</b>  | <b>46,254,346</b>   | <b>79.20%</b>       | <b>42,263,187</b>                            | <b>2,903,561</b>                             | <b>1,048,497</b>                | <b>39,101</b>                  |
| <b>1. PDX-B GEM</b>     | <b>49,892,923</b>  | <b>40,809,157</b>   | <b>81.79%</b>       | <b>36,141,204</b>                            | <b>3,880,058</b>                             | <b>747,034</b>                  | <b>40,861</b>                  |
| <b>2. PDX-B GSK</b>     | <b>52,431,848</b>  | <b>41,927,970</b>   | <b>79.97%</b>       | <b>38,660,867</b>                            | <b>2,285,473</b>                             | <b>938,664</b>                  | <b>42,966</b>                  |
| <b>3. PDX-B DEC</b>     | <b>43,372,857</b>  | <b>35,266,107</b>   | <b>81.31%</b>       | <b>31,677,112</b>                            | <b>2,860,299</b>                             | <b>696,647</b>                  | <b>32,049</b>                  |
| <b>4. PDX-B PAL</b>     | <b>28,730,565</b>  | <b>23,583,377</b>   | <b>82.08%</b>       | <b>20,456,801</b>                            | <b>2,659,627</b>                             | <b>429,511</b>                  | <b>37,438</b>                  |
| <b>5. PDX-B GEM+PAL</b> | <b>32,784,657</b>  | <b>27,282,576</b>   | <b>83.22%</b>       | <b>23,489,568</b>                            | <b>3,196,872</b>                             | <b>540,098</b>                  | <b>56,038</b>                  |

The mapping rate of RNA-Seq of each sample was ~80%. EBV transcripts comprised 0.1–0.2% of the total mapped transcripts
