# Supplementary material for: Integrated genomic analyses in PDX model reveal a cyclin-dependent kinase inhibitor Palbociclib as a novel candidate drug for nasopharyngeal carcinoma
Source: PubMed Central journal article supplement (PMC6149192; doi:10.1186/s13046-018-0873-5), 2018-09-20
Supplement: 13046_2018_873_MOESM10_ESM.pdf [file 13046_2018_873_MOESM10_ESM.pdf]

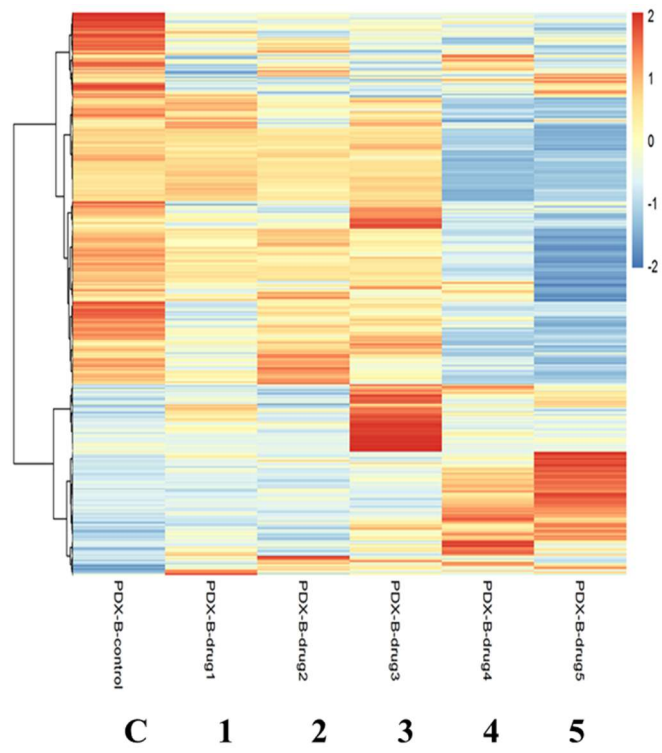

**Fig. S5. Heatmap of RNA-seq data of PDX-B and with 5 drug treatments.**
