# Supplementary material for: Integrated genomic analyses in PDX model reveal a cyclin-dependent kinase inhibitor Palbociclib as a novel candidate drug for nasopharyngeal carcinoma
Source: PubMed Central journal article supplement (PMC6149192; doi:10.1186/s13046-018-0873-5), 2018-09-20
Supplement: 13046_2018_873_MOESM12_ESM.pdf [file 13046_2018_873_MOESM12_ESM.pdf]

**Table S5. Correlation between CNV detected by WES and Q-PCR**

|        | WES/CNV |        |                     | Q-PCR/CNV   |             |             |
|--------|---------|--------|---------------------|-------------|-------------|-------------|
|        | CCND1   | CDKN2A | RAD52               | CCND1       | CDKN2A      | RAD52       |
| PDX-ST | 1.99    | 0.00   | 4.55                | 2.27        | 0.00        | 3.75        |
| WBC-ST | 1.97    | 2.06   | 2.11                | 1.94        | 2.12        | 2.15        |
| PDX-LN | 9.63    | 1.35   | 2.97                | 7.23        | 1.48        | 2.87        |
| WBC-LN | 2.04    | 2.03   | 1.99                | 2.07        | 2.73        | 2.40        |
| PDX-LG | 4.82    | 0.00   | 3.08                | 3.13        | 0.00        | 2.57        |
| WBC-LG | 2.02    | 1.88   | 2.04                | 1.53        | 1.99        | 2.21        |
| PDX-LV | 2.25    | 2.36   | 3.05                | 2.37        | 1.60        | 2.59        |
| WBC-LV | 1.97    | 2.03   | 1.86                | 1.44        | 1.78        | 1.68        |
| PDX-B  | 6.00    | 0.00   | 2.00                | 3.13        | 0.00        | 1.22        |
| WBC-B  | 2.00    | 2.00   | 2.00                | 1.55        | 1.71        | 1.77        |
|        |         |        | <b>CORREL ( r )</b> | <b>0.95</b> | <b>0.93</b> | <b>0.89</b> |
