# Supplementary material for: Integrated genomic analyses in PDX model reveal a cyclin-dependent kinase inhibitor Palbociclib as a novel candidate drug for nasopharyngeal carcinoma
Source: PubMed Central journal article supplement (PMC6149192; doi:10.1186/s13046-018-0873-5), 2018-09-20
Supplement: 13046_2018_873_MOESM13_ESM.pdf [file 13046_2018_873_MOESM13_ESM.pdf]

Fig. S7

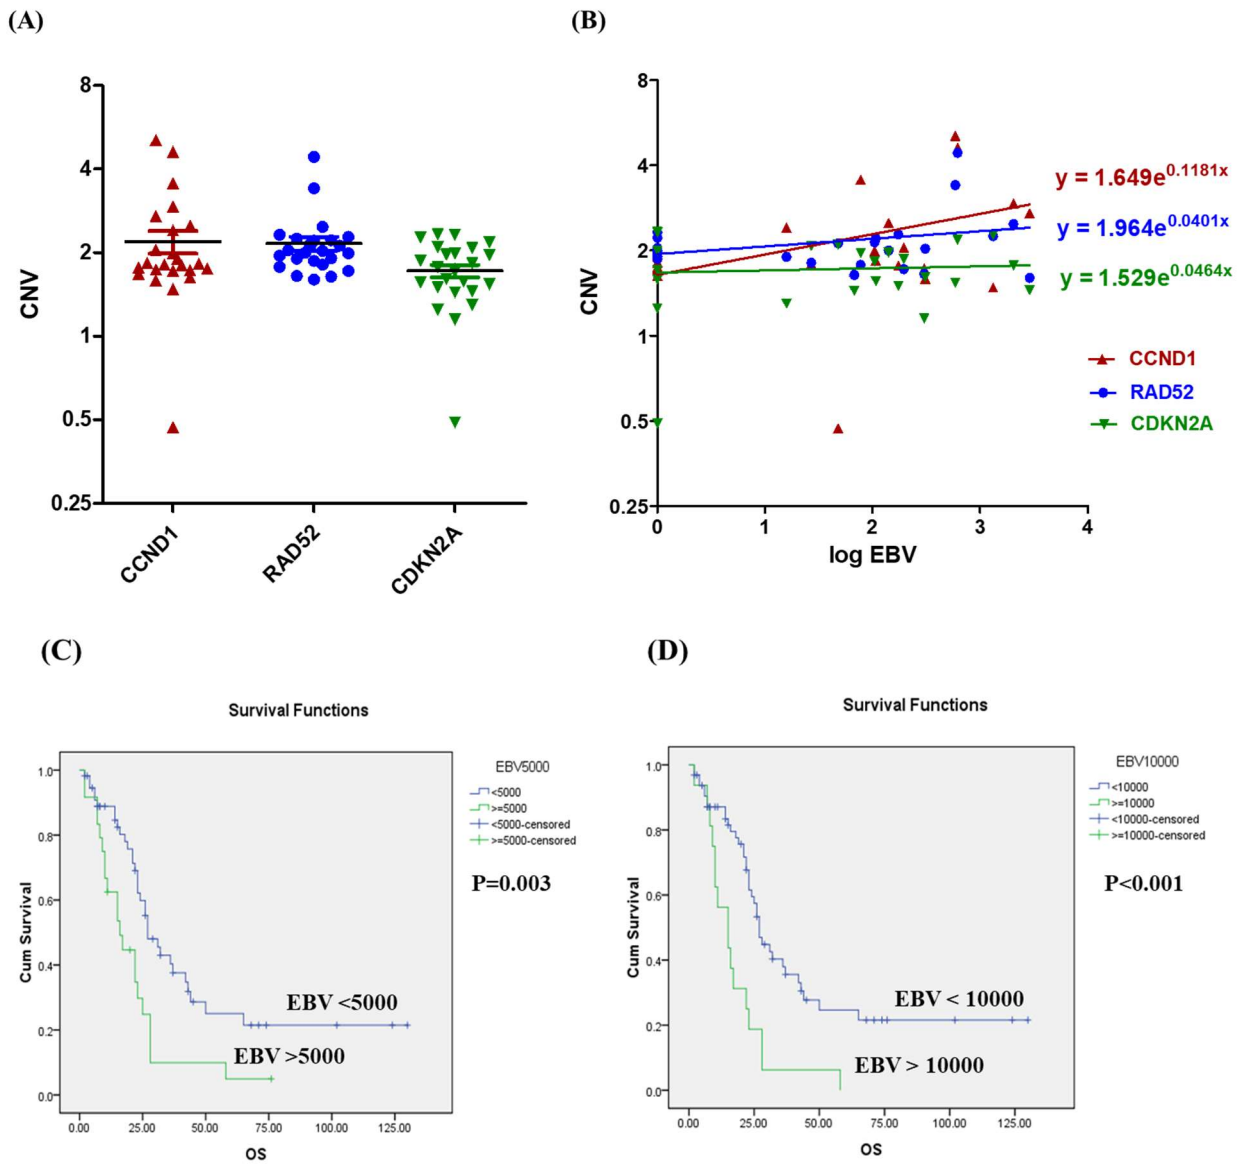

Fig. S7. Correlation between CNV of cellular genes and low EBV copy number in NPC plasma.
