# Supplementary material for: Integrated genomic analyses in PDX model reveal a cyclin-dependent kinase inhibitor Palbociclib as a novel candidate drug for nasopharyngeal carcinoma
Source: PubMed Central journal article supplement (PMC6149192; doi:10.1186/s13046-018-0873-5), 2018-09-20
Supplement: 13046_2018_873_MOESM14_ESM.pdf [file 13046_2018_873_MOESM14_ESM.pdf]

**Table S6A. CNV of CCND1, p16 and RAD52 in the 11 NPC patients' plasma with high EBV copy no. (>5000/ml)**

| NPC        | Plasma | EBV (copy no./ml) | log EBV (High) | CCND1  | CDKN2A | RAD52 | Ratio CCND1/CDKN2 A |
|------------|--------|-------------------|----------------|--------|--------|-------|---------------------|
| 1          | P7086  | 21,764            | 4.34           | 40.4   | 2.46   | 1.48  | 16.42               |
|            | P7333  | 477,336           | 5.68           | 10.28  | 0.89   | 1.87  | 11.55               |
| 2          | p4736  | 7,112             | 3.85           | 14.1   | 2.77   | 2.43  | 5.09                |
|            | p4837  | 131,652           | 5.12           | 35.46  | 1.89   | 2.08  | 18.76               |
| 3          | p4782  | 6,208             | 3.79           | 5.01   | 2.75   | 1.81  | 1.82                |
|            | p4831  | 36,140            | 4.56           | 35.06  | 5.35   | 2.31  | 6.55                |
| 4          | p5246  | 6,180             | 3.79           | 6.37   | 2.34   | 1.85  | 2.72                |
|            | p5359  | 138,748           | 5.14           | 12.25  | 1.04   | 1.66  | 11.78               |
| 5          | p4922  | 9,960             | 4              | 36.95  | 1.91   | 2.6   | 19.35               |
|            | p5034  | 19,508            | 4.29           | 18.14  | 1.34   | 1.45  | 13.54               |
| 6          | p5681  | 7,072             | 3.85           | 13.11  | 1.99   | 2.74  | 6.59                |
|            | p5772  | 79,508            | 4.9            | 17.22  | 2.58   | 1.88  | 6.67                |
| 7          | p5326  | 30,132            | 4.48           | 4.83   | 2.55   | 2.74  | 1.89                |
|            | p5733  | 300,128           | 5.48           | 105.31 | 1.65   | 1.94  | 63.82               |
| 8          | p6560  | 5,068             | 3.7            | 8.84   | 2.11   | 3.57  | 4.19                |
|            | p7314  | 96,324            | 4.98           | 24.51  | 0.93   | 0.7   | 26.35               |
| 9          | p6678  | 12,656            | 4.1            | 3.07   | 2.35   | 1.44  | 1.31                |
|            | p7096  | 479,596           | 5.68           | 13.88  | 0.68   | 2.35  | 20.41               |
| 10         | p4366  | 10,688            | 4.03           | 6.21   | 1.41   | 2.78  | 4.40                |
|            | p4892  | 229,800           | 5.36           | 23.87  | 0.82   | 2.91  | 29.11               |
| 11         | p4434  | 43,108            | 4.63           | 35.89  | 1.4    | 2.64  | 25.64               |
|            | p5233  | 1,458,344         | 6.16           | 19.93  | 0.93   | 3.86  | 21.43               |
| CORREL (r) |        |                   |                | 0.325  | -0.488 | 0.056 | <u>0.576</u>        |

**Table S6B. CNV of CCND1, p16 and RAD52 in the 24 NPC patients' plasma with low EBV copy no. (<5000/ml)**

| Plasma            | EBV (copy no./ml) | log EBV (Low) | CCND1        | CDKN2A | RAD52 | Ratio CCND1/CDKN2 A |
|-------------------|-------------------|---------------|--------------|--------|-------|---------------------|
| p5914             | -                 | 0             | 1.63         | 0.49   | 2.32  | 3.33                |
| p6640             | 1308              | 3.12          | 1.48         | 2.27   | 2.25  | 0.65                |
| p7917             | 584               | 2.77          | 5.08         | 1.54   | 3.41  | 3.30                |
| p3435             | 27                | 1.43          | 1.8          | 2.08   | 1.81  | 0.87                |
| p3490             | 107               | 2.03          | 1.84         | 1.56   | 2.21  | 1.18                |
| p3619             | 613               | 2.79          | 4.62         | 2.18   | 4.43  | 2.12                |
| p3715             | 141               | 2.15          | 2.5          | 1.97   | 2     | 1.27                |
| p3686             | -                 | 0             | 1.75         | 2.32   | 1.87  | 0.75                |
| p6391             | 304               | 2.48          | 1.73         | 1.15   | 1.65  | 1.50                |
| p3787             | 175               | 2.24          | 1.77         | 1.5    | 2.28  | 1.18                |
| p3962             | 16                | 1.2           | 2.41         | 1.3    | 1.9   | 1.85                |
| p4012             | 2024              | 3.31          | 2.93         | 1.77   | 2.48  | 1.66                |
| p4594             | 2904              | 3.46          | 2.71         | 1.45   | 1.6   | 1.87                |
| p4315             | 193               | 2.29          | 2.05         | 1.87   | 1.72  | 1.10                |
| p4608             | -                 | 0             | 1.82         | 1.71   | 1.91  | 1.06                |
| p4780             | 48                | 1.68          | 0.47         | 2.1    | 2.12  | 0.22                |
| p4826             | 1                 | 0             | 1.9          | 2.33   | 2.04  | 0.82                |
| p4317             | 78                | 1.89          | 3.56         | 1.96   | 1.78  | 1.82                |
| p4550             | -                 | 0             | 1.81         | 1.99   | 1.99  | 0.91                |
| p4924             | 312               | 2.49          | 1.59         | 1.61   | 2.03  | 0.99                |
| p5249             | -                 | 0             | 1.72         | 1.58   | 1.95  | 1.09                |
| p5646             | 104               | 2.02          | 1.99         | 1.83   | 2.14  | 1.09                |
| p6780             | -                 | 0             | 1.74         | 1.25   | 2.22  | 1.39                |
| p4974             | 68                | 1.83          | 1.68         | 1.44   | 1.64  | 1.17                |
| <b>CORREL (r)</b> |                   |               | <b>0.396</b> | 0.082  | 0.250 | 0.145               |
