# Supplementary material for: Integrated genomic analyses in PDX model reveal a cyclin-dependent kinase inhibitor Palbociclib as a novel candidate drug for nasopharyngeal carcinoma
Source: PubMed Central journal article supplement (PMC6149192; doi:10.1186/s13046-018-0873-5), 2018-09-20
Supplement: 13046_2018_873_MOESM15_ESM.pdf [file 13046_2018_873_MOESM15_ESM.pdf]

**Table S7. Immunohistochemical (IHC) staining of cyclin D1 in 139 NPC tissues from year 2002 to 2016.**

**Primary site: 33 samples; distant metastasis: 91 samples; and local regional recurrence: 15 samples.**

|                 | CCND1           | Primary site<br>(n=33)   | Distant Metastasis<br>(n=91) |                          |                         |                               | Local regional recurrence<br>(n=15) |
|-----------------|-----------------|--------------------------|------------------------------|--------------------------|-------------------------|-------------------------------|-------------------------------------|
|                 |                 |                          | Lung                         | Bone                     | Liver                   | LN <sup>1</sup> + soft tissue |                                     |
| <b>Total</b>    | <b>n=139</b>    | <b>33</b>                | <b>38</b>                    | <b>13</b>                | <b>27</b>               | <b>13</b>                     | <b>15</b>                           |
| <b>Negative</b> | <b>(-) n=9</b>  | <b>4</b>                 | <b>2</b>                     | <b>1</b>                 | <b>0</b>                | <b>1</b>                      | <b>1</b>                            |
| <b>Positive</b> | <b>n=130</b>    | <b>29/33<br/>(87.9%)</b> | <b>36/38<br/>(94.7%)</b>     | <b>12/13<br/>(92.3%)</b> | <b>27/27<br/>(100%)</b> | <b>12/13<br/>(92.3%)</b>      | <b>14/15<br/>(93.3%)</b>            |
|                 | <b>+ n=14</b>   | <b>1 (3.4%)</b>          | <b>4 (11.1%)</b>             | <b>4 (33.3%)</b>         | <b>4 (14.8%)</b>        | <b>0 (0%)</b>                 | <b>1 (7.1%)</b>                     |
|                 | <b>++ n=68</b>  | <b>13 (44.8%)</b>        | <b>20 (55.6%)</b>            | <b>4 (33.3%)</b>         | <b>15 (55.6%)</b>       | <b>7 (58.3%)</b>              | <b>9 (64.3%)</b>                    |
|                 | <b>+++ n=48</b> | <b>15 (51.7%)</b>        | <b>12 (33.3%)</b>            | <b>4 (33.3%)</b>         | <b>8 (29.6%)</b>        | <b>5 (41.7%)</b>              | <b>4 (28.6%)</b>                    |

1. IHC staining: Negative: grade  $\leq 1$  and cell population  $< 5\%$ ; Positive: grade  $> 1$  and cell population  $\geq 5\%$ .

2. LN<sup>1</sup>: lymph node; T/N<sup>2</sup>: primary site or local regional lymph node recurrence
