# Supplementary material for: Integrated genomic analyses in PDX model reveal a cyclin-dependent kinase inhibitor Palbociclib as a novel candidate drug for nasopharyngeal carcinoma
Source: PubMed Central journal article supplement (PMC6149192; doi:10.1186/s13046-018-0873-5), 2018-09-20
Supplement: 13046_2018_873_MOESM16_ESM.pdf [file 13046_2018_873_MOESM16_ESM.pdf]

**Table S8. Clinical characteristics of metastatic NPC patients with FFPE tissue cyclin D1 immunohistochemical staining (2002-2016)**

|                         | Total number (%) | CCND1 density, number (%) |              |              | P-value      |
|-------------------------|------------------|---------------------------|--------------|--------------|--------------|
|                         |                  | 1 (N=16)                  | 2 (N=46)     | 3 (N=29)     |              |
| <b>Sex</b>              |                  |                           |              |              |              |
| Male                    | 80 (87.9)        | 16 (100)                  | 39 (84.8)    | 25 (86.2)    | 0.259        |
| Female                  | 11 (12.1)        | 0 (0)                     | 7 (15.2)     | 4 (13.8)     |              |
| <b>Age</b>              |                  |                           |              |              |              |
| Mean                    | 51.1             | 50.8                      | 52.8         | 48.8         | 0.343        |
| Median                  | 51.0             | 50                        | 52.5         | 48.0         |              |
| <b>Pathology</b>        |                  |                           |              |              |              |
| undifferentiated        | 81 (89.0)        | 15 (93.8)                 | 42 (91.3)    | 24 (82.8)    | 0.412        |
| non-keratinising        | 10 (11.0)        | 1 (6.2)                   | 4 (8.7)      | 5 (17.2)     |              |
| <b>Metastatic site</b>  |                  |                           |              |              |              |
| 1                       | 63 (69.2)        | 12 (75.0)                 | 34 (73.9)    | 17 (58.6)    | 0.542        |
| 2                       | 23 (25.3)        | 3 (18.8)                  | 11 (23.9)    | 9 (31.0)     |              |
| 3                       | 3 (3.3)          | 1 (6.3)                   | 0 (0)        | 2 (6.9)      |              |
| 4                       | 2 (2.2)          | 0 (0)                     | 1 (2.2)      | 1 (3.4)      |              |
| <b>Solitary</b>         |                  |                           |              |              |              |
| 1                       | 35 (38.5)        | 8 (50.0)                  | 20 (43.5)    | 7 (24.1)     | 0.091        |
| ≥ 2                     | 56 (61.5)        | 8 (40.0)                  | 26 (56.5)    | 22 (75.9)    |              |
| <b>Chemotherapy</b>     |                  |                           |              |              |              |
| ¥ G+P                   | 43 (47.3)        | 9 (56.3)                  | 24 (52.2)    | 10 (34.5)    | 0.239        |
| # P/U/L+(B/M)           | 48 (52.7)        | 7 (43.8)                  | 22 (47.8)    | 19 (65.5)    |              |
| <b>Overall survival</b> |                  |                           |              |              |              |
| Month (median)          | 24.0             | 52.0                      | 26.0         | 15.0         | < 0.001      |
| Month (95% CI)          | 19.9 – 28.1      | 8.6 – 95.4                | 21.7 – 30.3  | 7.5 – 22.5   |              |
| <b>EBV* (copies/ml)</b> |                  |                           |              |              |              |
| mean                    | 23737            | 3221 (N=13)               | 10301 (N=43) | 57515 (N=25) | <b>0.046</b> |

¥ G+P: gemcitabine+cisplatin

# P/U/L+(B/M): cisplatin+UFT+calcium folinate + (bleomycin or mitomycin-c)

\* Among 91 metastatic NPC patients only 81 had plasma EBV DNA (copies/ml) data (patient's blood was collected after receiving metastatic site tissue proof).
