# Supplementary material for: Integrated genomic analyses in PDX model reveal a cyclin-dependent kinase inhibitor Palbociclib as a novel candidate drug for nasopharyngeal carcinoma
Source: PubMed Central journal article supplement (PMC6149192; doi:10.1186/s13046-018-0873-5), 2018-09-20
Supplement: 13046_2018_873_MOESM17_ESM.pdf [file 13046_2018_873_MOESM17_ESM.pdf]

**Table S9. (A) PDX-Bone tumor volume (mm<sup>3</sup>) and tumor weight (g) in drug screening**

| PDX-Bone (A) Tumor volume (mm <sup>3</sup> ) and tumor weight (g) |                |       |       |       |        |        |        |        |           |              |          |         |           |                |         |         |
|-------------------------------------------------------------------|----------------|-------|-------|-------|--------|--------|--------|--------|-----------|--------------|----------|---------|-----------|----------------|---------|---------|
| group                                                             | ear tag number | day 0 | day 4 | day 7 | day 11 | day 14 | day 18 | day 21 | Vol. Fold | Avg (Fold)   | SD       | T-test  | Tumor (g) | Avg            | SD      | T-test  |
| DMSO                                                              | DMSO1          | 127.3 | 225.2 | 293.7 | 502.6  | 822.2  | 1055.4 | 1592   | 12.50589  | <b>15.45</b> | 3.774176 |         | 1.421     | <b>1.15833</b> | 0.2822  |         |
|                                                                   | DMSO2          | 74.7  | 95.1  | 127.7 | 235.5  | 405.4  | 772.9  | 1056.3 | 14.14056  |              |          | 0.86    |           |                |         |         |
|                                                                   | DMSO3          | 73.6  | 138.9 | 205.8 | 414.1  | 601.3  | 1075.7 | 1450.3 | 19.70516  |              |          | 1.194   |           |                |         |         |
| Gemcitabine                                                       | GEM1           | 51.7  | 74.4  | 91.3  | 98.3   | 108.6  | 128.7  | 155.5  | 3.007737  | <b>3.96</b>  | 3.192214 | 0.01577 | 0.135     | <b>0.214</b>   | 0.20901 | 0.00961 |
|                                                                   | GEM2           | 83.9  | 146.9 | 193   | 303.8  | 331.3  | 395.6  | 630.6  | 7.516091  |              |          | *       | 0.451     |                |         | **      |
|                                                                   | GEM3           | 56.2  | 57.7  | 60.9  | 64.5   | 57.5   | 63.8   | 75.7   | 1.346975  |              |          | 0.056   |           |                |         |         |
| GSK126                                                            | GSK1           | 76    | 118.6 | 125.1 | 178    | 273.6  | 364.9  | 383.7  | 5.048684  | <b>7.19</b>  | 1.990564 | 0.02851 | 0.348     | <b>0.45633</b> | 0.13531 | 0.01776 |
|                                                                   | GSK2           | 56.3  | 78.9  | 118   | 176.8  | 244.6  | 381.4  | 505.7  | 8.982238  |              |          | *       | 0.413     |                |         | *       |
|                                                                   | GSK3           | 96    | 169.5 | 218.4 | 339.1  | 375.7  | 510.5  | 724.5  | 7.546875  |              |          | 0.608   |           |                |         |         |
| Decitabine                                                        | 1-Dec          | 71.8  | 126.1 | 211.2 | 217.8  | 272.2  | 346.8  | 378.3  | 5.268802  | <b>7.35</b>  | 2.394845 | 0.03491 | 0.286     | <b>0.40167</b> | 0.20818 | 0.02017 |
|                                                                   | 2-Dec          | 80    | 136.5 | 187.2 | 316.7  | 470.4  | 646.4  | 797.5  | 9.96875   |              |          | *       | 0.642     |                |         | *       |
|                                                                   | 3-Dec          | 52.1  | 61.3  | 92.4  | 121    | 152.4  | 227.4  | 355.3  | 6.819578  |              |          | 0.277   |           |                |         |         |
| Palbociclib                                                       | PAL1           | 98.2  | 143   | 172.2 | 200.2  | 224.1  | 215.9  | 196.5  | 2.001018  | <b>1.60</b>  | 0.757198 | 0.00338 | 0.149     | <b>0.12367</b> | 0.04917 | 0.00333 |
|                                                                   | PAL2           | 71.6  | 107.3 | 100   | 99     | 85.1   | 49.5   | 52.1   | 0.727654  |              |          | **      | 0.067     |                |         | **      |
|                                                                   | PAL3           | 94.3  | 166.5 | 191   | 204.8  | 195    | 176.3  | 195.6  | 2.074231  |              |          | 0.155   |           |                |         |         |
| Gem.+Pal                                                          | GEM+PAL1       | 62.6  | 82.3  | 75.9  | 76.4   | 65.7   | 59.5   | 47.6   | 0.760383  | <b>0.85</b>  | 0.35733  | 0.00262 | 0.025     | <b>0.037</b>   | 0.01908 | 0.00236 |
|                                                                   | GEM+PAL2       | 51.7  | 55.2  | 71.1  | 62.1   | 42     | 35.3   | 27.9   | 0.539652  |              |          | **      | 0.027     |                |         | **      |
|                                                                   | GEM+PAL3       | 66.2  | 145.7 | 132.2 | 109.8  | 103.5  | 106.1  | 82     | 1.238671  |              |          | 0.059   |           |                |         |         |

**Table S9. (B) PDX-Bone mice body weight (g) in drug screening**

| PDX-Bone (B) Mice body weight (g) |                |       |       |       |        |        |        |        |         |          |  |
|-----------------------------------|----------------|-------|-------|-------|--------|--------|--------|--------|---------|----------|--|
| group                             | ear tag number | day 0 | day 4 | day 7 | day 11 | day 14 | day 18 | day 21 | Avg (g) | SD       |  |
| DMSO                              | DMSO1          | 27.9  | 28.5  | 28.2  | 29.1   | 29.5   | 30.7   | 30.7   | 30.47   | 0.321455 |  |
|                                   | DMSO2          | 27.7  | 27.9  | 28.7  | 28.6   | 28.6   | 29.5   | 30.1   |         |          |  |
|                                   | DMSO3          | 27.3  | 26.6  | 28.5  | 28.7   | 29.4   | 30.2   | 30.6   |         |          |  |
| Gemcitabine                       | GEM1           | 27.7  | 27.3  | 27.7  | 28     | 28.2   | 28     | 28.2   | 28.60   | 1.153256 |  |
|                                   | GEM2           | 28.5  | 28.3  | 28.7  | 28.5   | 29.3   | 30.4   | 29.9   |         |          |  |
|                                   | GEM3           | 27    | 26.6  | 27    | 27.1   | 27.2   | 26.9   | 27.7   |         |          |  |
| GSK126                            | GSK1           | 25.1  | 25.5  | 25.4  | 25.6   | 24.8   | 25.8   | 24.2   | 24.90   | 0.7      |  |
|                                   | GSK2           | 25.7  | 25.8  | 25.5  | 25.5   | 25.8   | 25.7   | 24.9   |         |          |  |
|                                   | GSK3           | 26.3  | 27    | 26.3  | 27     | 24.8   | 26.1   | 25.6   |         |          |  |
| Decitabine                        | 1-Dec          | 26.9  | 26.9  | 26.5  | 27.4   | 27     | 27.7   | 24.4   | 26.67   | 2.354428 |  |
|                                   | 2-Dec          | 27.2  | 28.3  | 27.6  | 28.3   | 28.2   | 30.3   | 29.1   |         |          |  |
|                                   | 3-Dec          | 26.4  | 26.7  | 26.4  | 27.1   | 25.8   | 27.7   | 26.5   |         |          |  |
| Palbociclib                       | PAL1           | 28.3  | 28.7  | 28.3  | 29.2   | 29.2   | 30.2   | 29.1   | 25.70   | 3.616628 |  |
|                                   | PAL2           | 25.1  | 25.5  | 25.3  | 26.6   | 26.1   | 21.7   | 21.9   |         |          |  |
|                                   | PAL3           | 29    | 28.7  | 28.6  | 29.2   | 28.3   | 25.6   | 26.1   |         |          |  |
| Gem.+Pal.                         | GEM+PAL1       | 27.8  | 28.1  | 28.6  | 28.6   | 28.7   | 29.1   | 25.4   | 26.83   | 1.266228 |  |
|                                   | GEM+PAL2       | 28    | 28.1  | 26.9  | 26.6   | 26.8   | 28.6   | 27.8   |         |          |  |
|                                   | GEM+PAL3       | 25.7  | 26.7  | 26.2  | 25.7   | 24.9   | 27.4   | 27.3   |         |          |  |

**Table S9. (C) PDX-LN tumor volume (mm<sup>3</sup>) and tumor weight (g) in drug screening**

| PDX-LN (A) Tumor volume (mm <sup>3</sup> ) and tumor weight (g) |                |       |       |       |        |          |          |           |             |         |         |           |                |         |         |        |   |
|-----------------------------------------------------------------|----------------|-------|-------|-------|--------|----------|----------|-----------|-------------|---------|---------|-----------|----------------|---------|---------|--------|---|
| Group                                                           | ear tag number | day 0 | day7  | day14 | day21  | day 28   | day 35   | Vol. Fold | Avg (Fold)  | SD      | T-test  | Tumor (g) | Avg            | SD      | T-test  |        |   |
| DMSO                                                            | DSMO1          | 451.4 | 632.8 | 876.3 | 1243.1 | 1401.9   | 1,999.00 | 4.428445  | <b>3.53</b> | 0.78313 |         | 1.258     | <b>0.82533</b> | 0.37567 |         |        |   |
|                                                                 | DSMO2          | 348.9 | 455.9 | 598.5 | 752.6  | 1,010.60 | 1,094.80 | 3.137862  |             |         |         | 0.636     |                |         |         |        |   |
|                                                                 | DSMO3          | 301.6 | 473.4 | 608.7 | 758    | 883.4    | 909.2    | 3.014589  |             |         |         | 0.582     |                |         |         |        |   |
| GSK126                                                          | GSK1           | 296.7 | 381.5 | 421.2 | 669.6  | 1,015.90 | 1,209.40 | 4.076171  | <b>2.44</b> | 1.48725 | 0.32581 | 0.707     | <b>0.46867</b> | 0.25196 | 0.24378 |        |   |
|                                                                 | GSK2           | 342.6 | 501.4 | 554.2 | 655.5  | 750.3    | 712      | 2.078225  |             |         |         | 0.494     |                |         |         |        |   |
|                                                                 | GSK3           | 223.9 | 194.2 | 232.2 | 211.7  | 181.3    | 261.7    | 1.168825  |             |         |         | 0.205     |                |         |         |        |   |
| Gemcitabine                                                     | GEM1           | 490.7 | 620.1 | 145.7 | 99.3   | 64.8     | 49.8     | 0.101488  | <b>0.09</b> | 0.01922 | 0.00161 | 0.0258    | <b>0.01687</b> | 0.00786 | 0.02036 |        |   |
|                                                                 | GEM2           | 427.6 | 327.5 | 101.3 | 57.4   | 42.4     | 29.4     | 0.068756  |             |         |         | **        |                |         |         | 0.011  | * |
|                                                                 | GEM3           | 493.3 | 359.4 | 114.7 | 64.7   | 55.5     | 50.6     | 0.102574  |             |         |         |           |                |         |         | 0.0138 |   |
| Palbociclib                                                     | PAL1           | 323.6 | 370.1 | 303   | 213.5  | 195.5    | 183.7    | 0.567676  | <b>0.48</b> | 0.07994 | 0.00257 | 0.135     | <b>0.12933</b> | 0.06768 | 0.03425 |        |   |
|                                                                 | PAL2           | 191.6 | 187.1 | 173.8 | 165.1  | 126.8    | 79.5     | 0.414927  |             |         |         | **        |                |         |         | 0.059  | * |
|                                                                 | PAL3           | 536.2 | 507.8 | 497   | 383.4  | 316.8    | 241.5    | 0.450392  |             |         |         |           |                |         |         | 0.194  |   |

**Table S9. (D) PDX-LN mice body weight (g) in drug screening**

| PDX-LN (B) Mice body weight (g) |                |       |      |       |       |        |        |         |           |
|---------------------------------|----------------|-------|------|-------|-------|--------|--------|---------|-----------|
| Group                           | ear tag number | day 0 | day7 | day14 | day21 | day 28 | day 35 | Avg (g) | SD        |
| DMSO                            | DSMO1          | 31.4  | 31   | 31.4  | 32.5  | 32.6   | 32     | 32.27   | 0.9291573 |
|                                 | DSMO2          | 30.4  | 30.2 | 30.9  | 31    | 30.9   | 31.5   |         |           |
|                                 | DSMO3          | 32.8  | 33.7 | 33.6  | 33    | 33.8   | 33.3   |         |           |
| GSK126                          | GSK1           | 30.3  | 28.7 | 28    | 28.9  | 30.3   | 29.9   | 26.53   | 3.0369941 |
|                                 | GSK2           | 29.5  | 29.4 | 28.5  | 28.2  | 27.5   | 24     |         |           |
|                                 | GSK3           | 31.9  | 31.3 | 28.7  | 27.6  | 27.4   | 25.7   |         |           |
| Gemcitabine                     | GEM1           | 31.2  | 31.4 | 30.7  | 31.2  | 29.9   | 28.6   | 29.90   | 1.2529964 |
|                                 | GEM2           | 30.8  | 31   | 31.9  | 30.6  | 31     | 31.1   |         |           |
|                                 | GEM3           | 30.6  | 30.1 | 29.8  | 29.6  | 30     | 30     |         |           |
| Palbociclib                     | PAL1           | 29.5  | 25.7 | 26.4  | 27.6  | 28.5   | 28.7   | 27.03   | 1.942507  |
|                                 | PAL2           | 30.2  | 23.5 | 28.3  | 28.9  | 29.1   | 24.9   |         |           |
|                                 | PAL3           | 29.6  | 25.9 | 27    | 23.8  | 25.5   | 27.5   |         |           |
